# Supplementary material for: Top down method for synthesis of highly conducting graphene by exfoliation of graphite oxide using focused solar radiation
Source: Royal Society of Chemistry journal article supplement (doi:10.1039/c1jm10808e), 2011-01-01
Supplement: c1jm10808e.pdf [file c1jm10808e.pdf]

## Electronic Supplementary Information

# Top down method for Synthesis of Highly Conducting Graphene by Exfoliation of Graphite Oxide using Focused Solar Radiation

Varrla Eswaraiah, Sasidharannair Sasikaladevi Jyothirmayee Aravind and  
Sundara Ramaprabhu \*

Alternative Energy and Nanotechnology Laboratory (AENL), Nanofunctional Materials  
Technology Center (NFMTC), Department of Physics, Indian Institute of Technology Madras,  
Chennai 600036 (India)

\*Email: [ramp@iitm.ac.in](mailto:ramp@iitm.ac.in)

### Table of Contents

Synthesis of Graphite Oxide

Reduction and exfoliation of Graphite Oxide

Figure S1: Power and Temperature profile of the focused solar radiation with respect to time during exfoliation of Graphite oxide.

Figure S2: FTIR spectra of (a) G (b) GO and (c) sG.

Figure S3: a) FESEM image of sG and (b & c) elemental mapping of Carbon (Red dots) and Oxygen (Green dots)

Figure S4: Energy dispersive spectra (EDX) of solar graphene (Reduced area scan)

Figure S5: Energy dispersive spectra (EDX) of solar graphene (Full area scan)

Figure S6: Quantification of atomic carbon and oxygen content analyzed using EDX spectra of sG.

Table S1: Power of focused EM radiation at different wavelengths using 90 mm converging lens

Table S2: Comparison table of various synthesis methods for the reduction of graphite oxide.

Table S3:  $I_D/I_G$  comparison of graphene prepared by different methods.

## Experimental section

### 1. Preparation of Graphite Oxide

GO was prepared according to Modified Hummers method. SP-1 (Bay Carbon) graphite was used as the starting material. Briefly, graphite was grounded with NaCl and washed with DI water followed by filtration. After drying, the filtrate was stirred with conc. H<sub>2</sub>SO<sub>4</sub> for 8 h. 6 g of KMnO<sub>4</sub> was gradually added while keeping the temperature less than 20 °C. The mixture was stirred at 35 to 40 °C for 30 min and 65 to 80 °C for 40 min. 92 ml water was added to the above solution and heated to ~ 100 °C. This was diluted by adding 280 ml of water followed by the addition of 30% H<sub>2</sub>O<sub>2</sub>. The mixture was washed followed by repeated centrifugation and filtration (first by 5 % HCl and then with water). The final product was washed and dried in vacuum.

### 2. Reduction and Exfoliation of Graphite Oxide

GO was spread over petri dish and kept under sunlight. A convex lens of diameter 90 mm was used to focus the incoming radiation from the sun and its power at different wavelengths are shown in the table S1. A series of experiments have been performed with lenses of different diameters 50 mm, 75 mm, 90 mm and 100 mm. The efficient exfoliation has been achieved using 90 mm and 100 mm diameter lenses even at moderate intense sunlight. Hence further experiments have been carried out using 90 mm converging lens. The power of the focused radiation was ranging from 1.77 - 2.03 W and temperature raised to more than 150° C (figure S1).

| <b>Wavelength<br/>(nm)</b> | <b>Power of focused EM radiation<br/>(W)<br/>using 90 mm converging lens</b> |
|----------------------------|------------------------------------------------------------------------------|
| 400                        | 1.83-2.09                                                                    |
| 470                        | 1.90-1.95                                                                    |
| 500                        | 1.89-2.04                                                                    |
| 600                        | 1.98-2.12                                                                    |
| 700                        | 2.01-2.13                                                                    |

**Table S1:** Power of focused EM radiation at different wavelengths using 90 mm converging lens

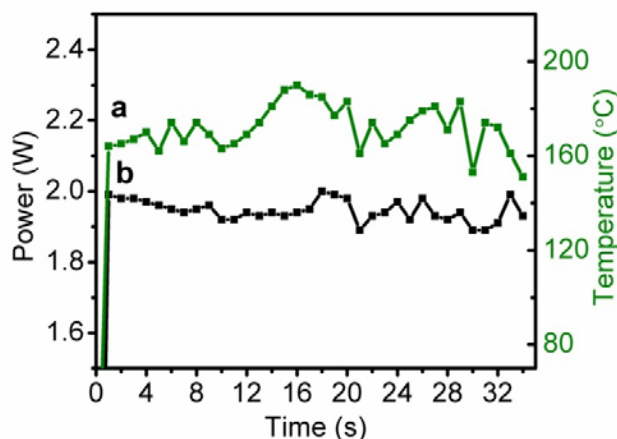

**Fig. S1.** Power and temperature profile of the focused solar radiation with respect to time during exfoliation of Graphite oxide.

### 3. Characterization Techniques

The XRD measurements were performed with a PANalytical X'Pert Pro X-ray diffractometer with nickel-filtered Cu K $\alpha$  radiation as the X-ray source. The pattern was recorded in the  $2\theta$  range of  $5^\circ - 40^\circ$  with a step size of  $0.016^\circ$ . Raman spectroscopy was performed on Witec Raman microscope using green (532 nm) laser excitation, with excitation energy of 2.33 eV. Scans were taken on an extended range ( $500-3000\text{ cm}^{-1}$ ) for an exposure time of 60 s. The samples were sprinkled over cleaned glass slides for observation and viewed under a maximum magnification of  $\times 20$ . FTIR was performed on Perkin Elmer spectrum one spectrometer in the range of  $400-4000\text{ cm}^{-1}$  using KBr pellet method. Thermo gravimetric spectra were recorded with NETZSCH analyzer from ambient temperature to  $800^\circ\text{C}$  in  $\text{N}_2$  atmosphere with temperature heating of  $10^\circ\text{C}/\text{min}$ . Field emission scanning electron microscopy (FESEM, Quanta 3D) imaging was used to examine the morphology of the synthesized samples. Samples were mounted on a standard aluminium specimen stub using double sided conductive carbon tape. The microscope was operated at an accelerating voltage of 5-30 kV depending on different imaging purposes. EDX spectra was recorded with Li doped Silicon X-ray detector equipped with FESEM. High resolution micrographs were obtained with FEI Tecnai G<sup>2</sup> transmission electron microscope operated at 200 keV. The samples were dispersed in ethanol and drop cast over holey carbon coated copper grid (200 mesh). The samples were dried over night in ambient atmosphere. The AFM measurements were performed in tapping mode using Park systems XE-100. For imaging, samples were placed on freshly cleaved HOPG surface by spin coating from a suspension at 2000 rpm for 20 s. Suspensions were prepared by mixing 1 mg of sG with 10 ml of DMF by ultrasonication for 15 min. This suspension was diluted to a concentration of 0.02 mg/ml. Model 842.PE Newport optical thermopile based power meter was used to measure the power of radiation. Agilent thermocouple based temperature sensor was used to measure the temperature of the focused radiation.

A comparative study describing different synthesis techniques of graphene by either reduction or exfoliation of GO and the experimental conditions involved has been depicted in table S2. The table clearly shows that, most of the techniques for exfoliation of GO involved sophisticated instruments, man power, poisonous chemicals and time consuming processes. But in the present study, there are no chemicals involved and the ease of preparation makes it an excellent green approach for the synthesis of graphene.

| <b>Method</b>                       | <b>Experimental conditions</b>                                                                                                                                                                                                                                                                                                                                                                                                                                                                                  | <b>Reference and year</b> |
|-------------------------------------|-----------------------------------------------------------------------------------------------------------------------------------------------------------------------------------------------------------------------------------------------------------------------------------------------------------------------------------------------------------------------------------------------------------------------------------------------------------------------------------------------------------------|---------------------------|
| GO reduction by alkaline conditions | 100 W, 40 kHz, 1 h intense ultrasonication and centrifugation of GO suspension for 2h at 23,000 rpm and heating in alkaline solutions.                                                                                                                                                                                                                                                                                                                                                                          | [1], 2008                 |
| Solvothermal reduction method       | Sonication at 50° C for 60 min and diluted with NMP, degassed for 60 min, bath sonication at 240° C for 24 h under argon atmosphere, centrifuge at 4500 rpm and annealed at 250, 500 and 1000°C                                                                                                                                                                                                                                                                                                                 | [2], 2010                 |
| Thermal exfoliation                 | The dried graphite oxide is charged into a quartz tube and purged with argon. Rapid heating (>2000 °C/min) to 1050 °C                                                                                                                                                                                                                                                                                                                                                                                           | [3], 2006                 |
| Arc discharge exfoliation           | GO was rapidly heated by arc discharge in a mixed buffer gas of H <sub>2</sub> (≤10 kPa pressure) and argon (90 kPa pressure). High-temperature discharge between the two electrodes were generated by a direct current mode ranging from 100 to 150 A. The resulting exfoliated graphite (10 mg) was dispersed in 10 mL of NMP for 2 h by sonication. Suspension was centrifuged at 15000 rpm for 5 min to remove thick graphene sheets and nonexfoliated graphite, and to retain thin GSs in the supernatant. | [4], 2009                 |
| Vacuum exfoliation                  | The asprepared GO was put into a quartz tube connected to vacuum pump. The tube was heated at the rate of 50 °C/min under a high vacuum (<1 Pa) and kept at 200 °C for 5 h                                                                                                                                                                                                                                                                                                                                      | [5], 2009                 |
| Chemical reduction                  | GO (100 mg) dispersion was sonicated using ultrasonic bath cleaner (150 W). Hydrazine hydrate (1.00 mL, 32.1 mmol) was then added and kept in oil bath at 100 °C under a water-cooled condenser for 24 h over which the reduced GO gradually precipitated and isolated by filtration and washed with water and dried.                                                                                                                                                                                           | [6], 2007                 |
| Laser reduction                     | Graphene formation using pulsed (~9 ns, 20 Hz) irradiation was carried out using the frequency-doubled (532 nm) and -tripled (355 nm) outputs of a Nd:YAG laser from Raman                                                                                                                                                                                                                                                                                                                                      | [7], 2010                 |

|                        |                                                                                                                                                                                                                                                                                                                                                                                                                                                                                                                                                                                                         |                   |
|------------------------|---------------------------------------------------------------------------------------------------------------------------------------------------------------------------------------------------------------------------------------------------------------------------------------------------------------------------------------------------------------------------------------------------------------------------------------------------------------------------------------------------------------------------------------------------------------------------------------------------------|-------------------|
|                        | microscope.                                                                                                                                                                                                                                                                                                                                                                                                                                                                                                                                                                                             |                   |
| Microwave reduction    | 20 mg of GO were dispersed into 6 mL water under mild ultrasound. Then 30 mL of DMAc was added and sonicated for few minutes and suspension was obtained in the mixture of DMAc/H <sub>2</sub> O. For the microwave thermal reduction experiment, 36 mL of the prepared GO suspension in DMAc/H <sub>2</sub> O (0.56 mg mL <sup>-1</sup> ) was put into a microwave oven (Galanz, G70D20ASP-DF, China) under dry nitrogen gas, and it was treated for different time in the range of 1–10 min at 800 W. After washing with ethanol for three times then the mixture was freeze dried at 80 °C for 24 h. | [8], 2010         |
| Flash reduction        | Flash reduction of free-standing GO films can be done with a single, close-up (<1 cm) flash from the Xenon lamp equipped on a common digital camera. Most experiments were done with a Sunpak 383 stand-alone flash unit with a larger window size of around 30 mm × 50 mm                                                                                                                                                                                                                                                                                                                              | [9], 2009         |
| Hydrothermal           | 25 mL of 0.5 mg/mL GO aqueous solution was transferred to a Teflon-lined autoclave and heated at 180 °C for 6 h.                                                                                                                                                                                                                                                                                                                                                                                                                                                                                        | [10], 2009        |
| Electrochemical method | The electrochemical reduction of GO in a three-electrode system (Pt as counter electrode, saturated calomel electrode as reference electrode, GO film coated over GCE as working electrode). Electrochemical reduction experiments were performed on a CHI at a constant potential (–1.5 or –1.3 V vs SCE) in 10 mmol/L pH 5.0 PBS (K <sub>2</sub> HPO <sub>4</sub> /KH <sub>2</sub> PO <sub>4</sub> ) under stirring for 2 h                                                                                                                                                                           | [11], 2009        |
| Solar exfoliation      | GO powder in a petri dish irradiated with focused solar radiation using a converging lens undergone exfoliation within a few seconds.                                                                                                                                                                                                                                                                                                                                                                                                                                                                   | Present technique |

**Table S2:** Comparison table for various synthesis methods for the reduction of graphite oxide.

#### 4. Raman Fingerprints

Raman spectroscopy gives information about the existence of  $sp^2$  and  $sp^3$  bonds present in any carbon nanostructure. From the Raman spectra it is clear that graphite is having most  $sp^2$  hybridization bonds due to its basic conjugated  $\pi$  electrons as the intensity of its D-band is minimal.<sup>12-13</sup> In the case of GO, which is deformed structurally having more defects due to the incorporation of epoxide, carbonyl and hydroxyl functional groups which is clear from the broadening of the spectra. After exfoliation of GO by solar radiation, the graphite oxide loses its functional groups and the reduced graphene (*sG*) gains conjugated electrons, which is evident from the reduction in peak intensity of D band in *sG*. Further, the defects induced in solar exfoliated graphene is much lower compared with that observed during chemical reduction methods such as reduction of graphite oxide by Fe,<sup>14</sup> sodium borohydride,<sup>15</sup> hydrazine hydrate,<sup>16</sup> and hydrothermal reduction.<sup>10</sup>

The ratio of intensities of D and G bands has been compared in table S3. The  $I_D/I_G$  ratio is normally used as an indication of the level of chemical modification in graphitic carbon. Raman spectrum of *sG* shows a minimal  $I_D/I_G$  value, indicating its less defective nature.

| S. No | Method of Reduction of GO | $I_D/I_G$   | Reference |
|-------|---------------------------|-------------|-----------|
| 1     | NaBH <sub>4</sub>         | >1          | [15]      |
| 2     | Hydrothermal              | 0.90        | [16]      |
| 3     | Hydrazine                 | 1.63        | [10]      |
| 4     | Fe                        | 0.32        | [14]      |
| 6     | Hydroquinone              | >1          | [17]      |
| 7     | Solvothermal              | ~0.86       | [18]      |
| 8     | Electrochemical           | >1          | [11]      |
| 9     | arc discharge             | 0.26        | [19]      |
| 10    | Microwaves                | 0.96        | [8]       |
| 11    | Solar EM radiation        | <b>0.20</b> | present   |

**Table S3:**  $I_D/I_G$  comparison of graphene prepared by different methods.

## 5. Fourier Transform Infrared Spectra

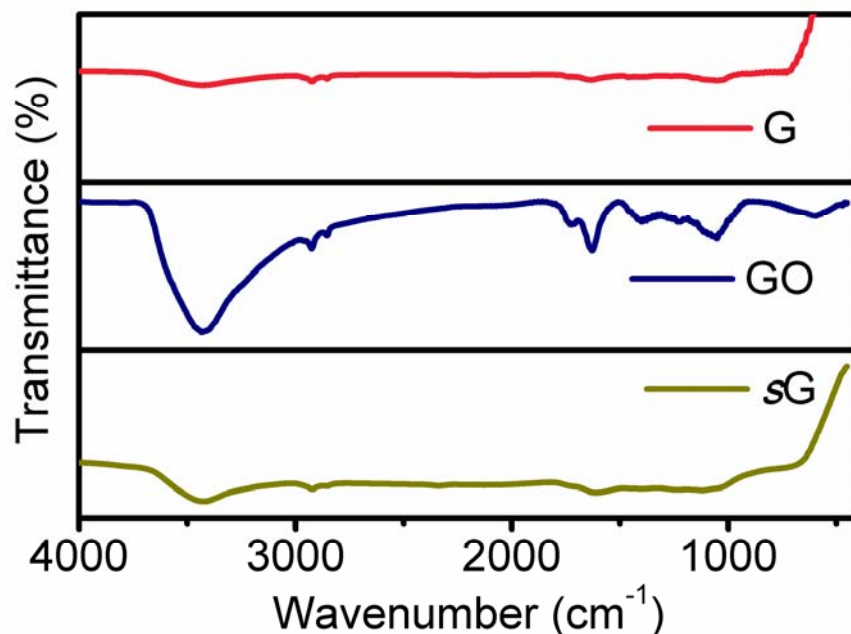

**Fig. S2:** FTIR spectra of Graphite, Graphite Oxide and Solar graphene

It is observed that the spectrum of graphite is deficient of any functional groups except O-H stretching vibrations ( $3427\text{ cm}^{-1}$ ) whereas GO identified the presence of following functional groups. O-H stretching vibrations ( $3432\text{ cm}^{-1}$ ),  $\text{CH}_2$  asymmetric and symmetric stretching vibrations ( $2924$  and  $2852\text{ cm}^{-1}$ ), C=O stretching vibrations ( $1725\text{ cm}^{-1}$ ), C=C from unoxidized  $\text{sp}^2$  bonds ( $1627\text{ cm}^{-1}$ ), O-H bending deformation ( $1408\text{ cm}^{-1}$ ) and C-O vibrations ( $1049\text{ cm}^{-1}$ ). This confirms the presence of hydroxyl, epoxide and carbonyl functional groups in GO as shown in the figure S2. On the otherhand, the spectrum of *sG* exhibits a broad O-H band ( $3436\text{ cm}^{-1}$ ) which can be due to adsorbed moisture. The absence of any other oxygen containing functional groups in *sG* clearly validates the exfoliation process.<sup>20</sup>

## 6. Elemental Mapping, Morphology and Composition Analysis

FESEM and EDX analyses of irradiated samples over different regions have been performed for the quantification of oxygen content. The elemental mapping as well as the full and reduced area EDX recorded is displayed in figure S3, S4 and S5. Carbon and oxygen mapping using red and green colours provides the visualization of almost negligible oxygen content present after deflagration of GO by solar irradiation. The carbon and oxygen peaks observed at  $0.265\text{ eV}$  ( $\text{K}_\alpha$ ) and  $0.514\text{ eV}$  ( $\text{K}_\alpha$ ) can be seen from figures S4 and S5.

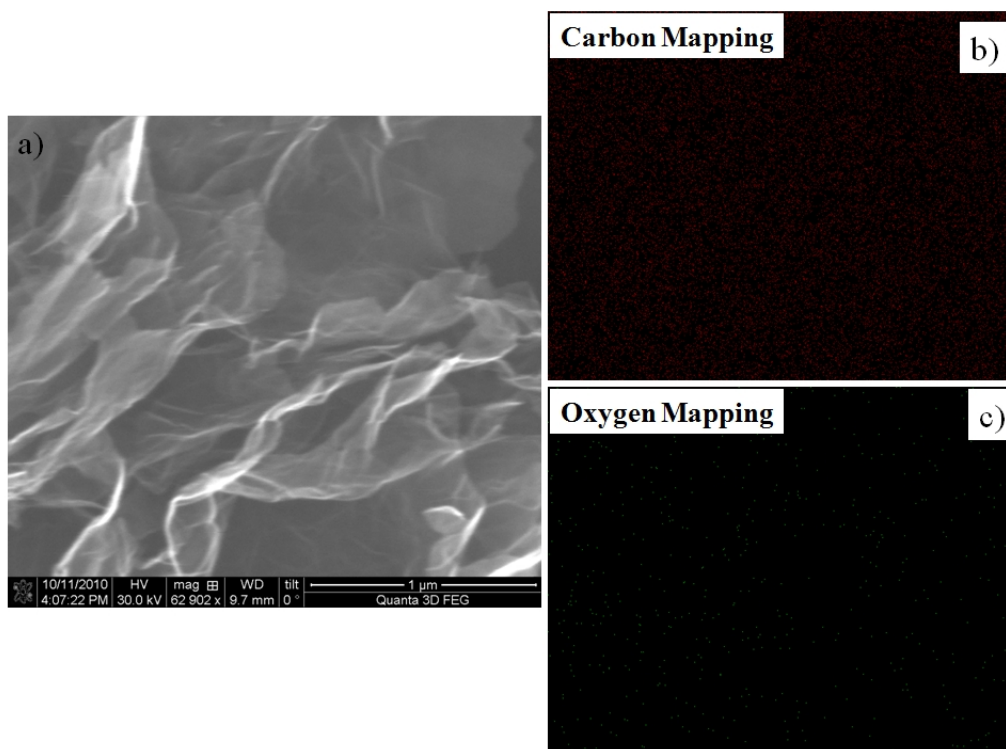

**Fig. S3.** a) FESEM image of *sG* and (b & c) elemental mapping of Carbon (Red dots) and Oxygen (Green dots)

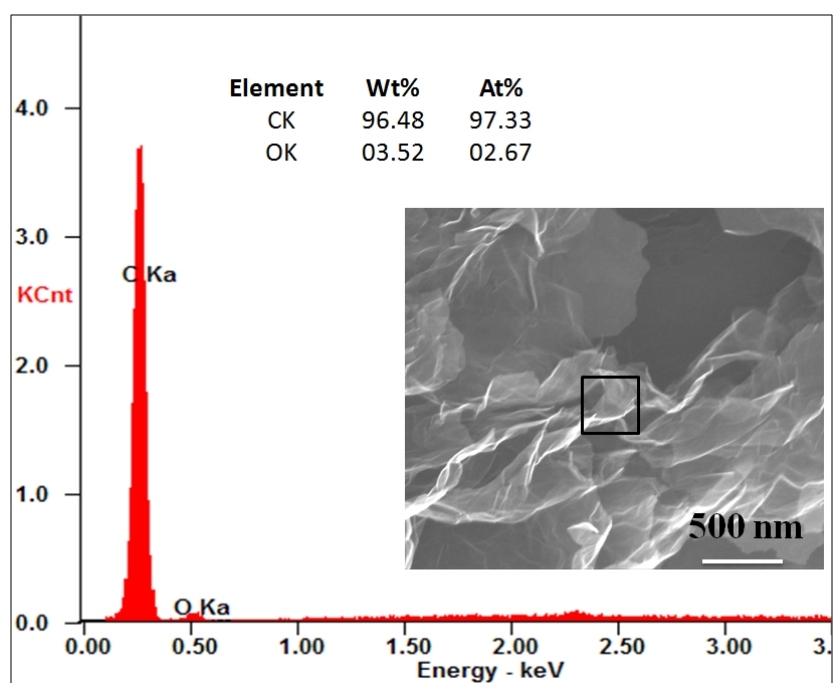

**Fig. S4:** Energy dispersive spectra (EDX) of solar graphene (Reduced area scan)



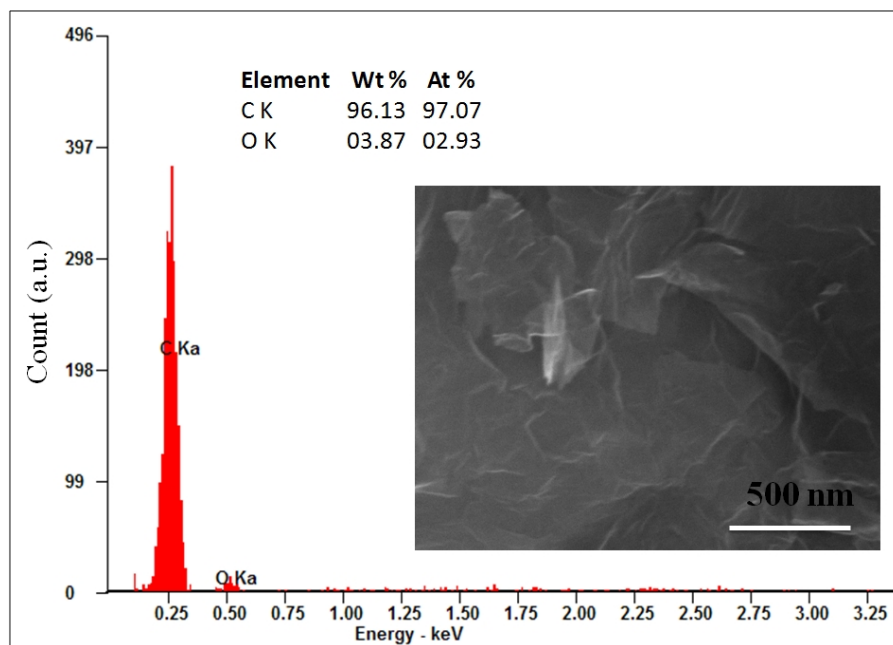

**Fig. S5:** Energy dispersive spectra (EDX) of solar graphene (Full area scan)

The histogram plotted by taking a number of EDX spectra at different locations of solar graphene has been depicted in figure S6. The efficient deflagration of GO resulted in negligible oxygen functionalities in solar graphene. The remaining 2-6 wt % of oxygen may be due to the presence of minute quantity of adsorbed functional molecules. This result can be justified by comparing with the literature report of modeling of the structure<sup>21</sup> of GO where the difficulty in complete reduction of GO has been demonstrated.

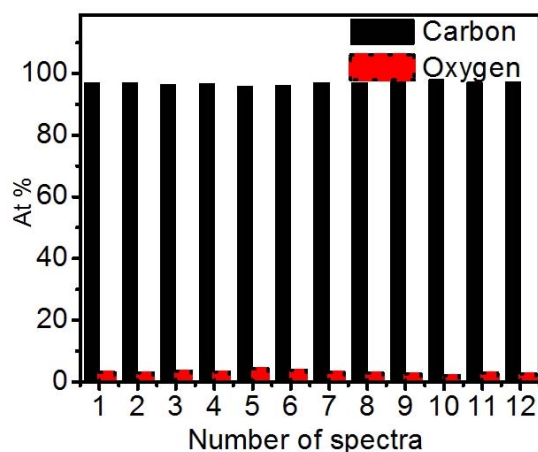

**Fig. S6.** Quantification of atomic carbon and oxygen content analyzed using EDX spectra of *sG*.

## 7. Electrical conductivity

Two probe method was employed for measuring electrical conductivity of the GO where as for Graphite and Graphene, collinear four probe technique was used in order to avoid contact resistance, lead resistance etc. Positive constant current was applied to the 1<sup>st</sup> and 4<sup>th</sup> terminal and corresponding voltage was measured between 2<sup>nd</sup> and 3<sup>rd</sup> terminals. Similarly negative constant current was applied and corresponding voltage was measured. Positive and negative currents were applied in order to avoid voltage generation due to thermoelectric effects. All input and measured parameters were substituted in equations 1, 2 and 3 for calculating conductivities of the samples G, GO and sG.

Two probe technique, electrical resistivity ( $\Omega\text{-m}$ )

$$R = \frac{\rho l}{A} \text{-----} (1)$$

Where R is the measured resistance between the two probes ( $\Omega$ )

l is the probe separation (m)

and A is the area of current distribution ( $\text{m}^2$ )

Four point collinear probe technique

$$\rho = \frac{\pi t}{\ln 2} \frac{(V_+ - V_-)}{2I} k \text{-----} (2)$$

Where  $\rho$  is electrical resistivity ( $\Omega\text{-m}$ )

t is the thickness of the sample (m)

I is the applied current (A)

$k = k_1 k_2$  is the correction factor due to finite size and dimensions

$V_+$  is the measured voltage for applied positive current (V)

$V_-$  is the measured voltage for applied negative current (V)

Reciprocal of resistivity is known as conductivity ( $\sigma$ )

$$\sigma = \frac{1}{\rho} \text{ (S/m)-----} (3)$$

## References:

1. X. Fan, W. Peng, Y. Li, X. Li, S. Wang, G. Zhang and F. Zhang, *Adv. Mater.* **2008**, *20*, 4490.
2. S. Dubin, S. Gilje, K. Wang, V. C. Tung, K. Cha, A. S. Hall, J. Farrar, R. Varshneya, Y. Yang and R. B. Kaner, *ACS Nano* **2010**, *4*, 3845.
3. H. C. Schniepp, J.-L. Li, M. J. McAllister, H. Sai, M. Herrera-Alonso, D. H. Adamson, R. K. Prud'homme, R. Car, D. A. Saville and I. A. Aksay, *J. Phys. Chem. B* **2006**, *110*, 8535.
4. Z.-S. Wu, W. Ren, L. Gao, J. Zhao, Z. Chen, B. Liu, D. Tang, B. Yu, C. Jiang and H.-M. Cheng, *ACS Nano* **2009**, *3*, 411.
5. W. Lv, D.-M. Tang, Y.-B. He, C.-H. You, Z.-Q. Shi, X.-C. Chen, C.-M. Chen, P.-X. Hou, C. Liu and Q.-H. Yang, *ACS Nano* **2009**, *3*, 3730.
6. S. Stankovich, D. A. Dikin, R. D. Piner, K. A. Kohlhaas, A. Kleinhammes, Y. Jia, Y. Wu, S. T. Nguyen and R. S. Ruoff, *Carbon* **2007**, *45*, 1558.
7. D. A. Sokolov, K. R. Shepperd and T. M. Orlando, *J. Phys. Chem. Lett.*, **2010**, *1*, 2633.
8. W. Chen, L. Yan and P. R. Bangal, *Carbon* **2010**, *48*, 1146.
9. L. J. Cote, R. Cruz-Silva and J. Huang, *J. Am. Chem. Soc.* **2009**, *131*, 11027.
10. Y. Zhou, Q. Bao, L. A. L. Tang, Y. Zhong and K. P. Loh, *Chem. Mater.* **2009**, *21*, 2950.
11. H.-L. Guo, X.-F. Wang, Q.-Y. Qian, F.-B. Wang and X.-H. Xia, *ACS Nano* **2009**, *3*, 2653.
12. M. S. Dresselhaus, A. Jorio, M. Hofmann, G. Dresselhaus and R. Saito, *Nano Lett.* **2010**, *10*, 751.
13. S. Niyogi, E. Bekyarova, M. E. Itkis, H. Zhang, K. Shepperd, J. Hicks, M. Sprinkle, C. Berger, C. N. Lau, W. A. deHeer, E. H. Conrad and R. C. Haddon, *Nano Lett.* **2010**, *10*, 4061.
14. Z.-J. Fan, W. Kai, J. Yan, T. Wei, L.-J. Zhi, J. Feng, Y.-m. Ren, L.-P. Song and F. Wei, *ACS Nano*, 2010, **5**, 191.

15. H.-J. Shin, K. K. Kim, A. Benayad, S.-M. Yoon, H. K. Park, I.-S. Jung, M. H. Jin, H.-K. Jeong, J. M. Kim, J.-Y. Choi and Y. H. Lee, *Adv. Funct. Mater.* **2009**, *19*, 1987.
16. J. Yan, Z. Fan, T. Wei, W. Qian, M. Zhang and F. Wei, *Carbon* **2010**, *48*, 3825.
17. G. Wang, J. Yang, J. Park, X. Gou, B. Wang, H. Liu and J. Yao, *J. Phys. Chem. C* **2008**, *112*, 8192.
18. M. Choucair, P. Thordarson and J. A. Stride, *Nat. Nanotechnol.* **2009**, *4*, 30.
19. N. Li, Z. Wang, K. Zhao, Z. Shi, Z. Gu and S. Xu, *Carbon* **2010**, *48*, 255.
20. H.-L. Guo, X.-F. Wang, Q.-Y. Qian, F.-B. Wang and X.-H. Xia, *ACS Nano*, **2009**, *3*, 2653-2659.
21. D. W. Boukhvalov and M. I. Katsnelson, *J. Am. Chem. Soc.* **2008**, *130*, 10697.
